# Supplementary material for: GPR84-mediated signal transduction affects metabolic function by promoting brown adipocyte activity
Source: JCI journal article supplement (doi:10.1172/jci168992), 2023-10-19
Supplement: sd1 [file 1]

## SUPPLEMENTAL INFORMATION

### **GPR84-mediated signal transduction affects metabolic function by promoting brown adipocyte activity**

Xue-Nan Sun<sup>1</sup>, Yu A. An<sup>1,2</sup>, Vivian A. Paschoal<sup>1</sup>, Camila O. de Souza<sup>1</sup>, May-yun Wang<sup>1</sup>, Lavanya Vishvanath<sup>1,3</sup>, Lorena M. A. Bueno<sup>1</sup>, Ayanna S. Cobb<sup>1</sup>, Joseph A. Nieto Carrion<sup>1</sup>, Madison E. Ibe<sup>1</sup>, Chao Li<sup>1</sup>, Harrison A. Kidd<sup>4</sup>, Shiuhwei Chen<sup>1</sup>, Wenhong Li<sup>4</sup>, Rana K. Gupta<sup>1,3</sup>, and Da Young Oh<sup>1,\*</sup>

<sup>1</sup>Touchstone Diabetes Center, Department of Internal Medicine, University of Texas Southwestern Medical Center, Dallas, TX 75390, USA, <sup>2</sup>Department of Anesthesiology, McGovern Medical School, The University of Texas Health Science Center, Houston, TX 77225, USA, <sup>3</sup>Division of Endocrinology, Department of Medicine, Duke Molecular Physiology Institute, Durham, NC 27701, USA, <sup>4</sup>Department of Cell Biology, University of Texas Southwestern Medical Center, Dallas, TX 75390, USA

\* To whom correspondence should be addressed; Da Young Oh, PhD

E-mail: [dayoung.oh@utsouthwestern.edu](mailto:dayoung.oh@utsouthwestern.edu)

**Supplemental Table 1. Primers used for qPCR**

| Gene Symbol     | Primer forward (5' → 3')   | Primer reverse (5' → 3')    |
|-----------------|----------------------------|-----------------------------|
| <i>Gpr84</i>    | TCCAATTCTGTCTCCATCCT       | CTGACTGGCTCAGATGAAA         |
| <i>Ucp1</i>     | AAGCTGTGCGATGTCCATGT       | AAGCCACAAACCCTTTGAAAA       |
| <i>Dio2</i>     | TTGGGGTAGGGAATGTTGGC       | TCCGTTTCCTCTTTCCGGTG        |
| <i>Cidea</i>    | TCCTATGCTGCACAGATGACG      | TGCTCTTCTGTATCGCCCAGT       |
| <i>Pgc1α</i>    | TCCTCACACCAAACCCACAGAA     | TTGGCTTGAGCATGTTGCCA        |
| <i>Pparg</i>    | GCCCTTTGGTGACTTTATGGA      | GCAGCAGGTTGTCTTGATG         |
| <i>Cox8b</i>    | TGCTGGAACCATGAAGCCAAC      | AGCCAGCCAAAACCTCCCACTT      |
| <i>Prdm16</i>   | ACACGCCAGTTCTCCAACCTGT     | TGCTTGTTGAGGGAGGAGGTA       |
| <i>Resistin</i> | AAGAACCTTTCATTTCCCCTCCT    | GTCCAGCAATTTAAGCCAATGTT     |
| <i>Leptin</i>   | ATGTGCCCTTCCGATATACAACC    | CGTGTCATCCACTAATCTTCTGG     |
| <i>Tie3</i>     | GAGACTGAACACAATCCTAGCC     | GGAGTCCACGTACCCCGAT         |
| <i>Gsta3</i>    | AGATCGACGGGATGAACTGG       | CAGATCCGCCACTCCTTCT         |
| <i>Zfp423</i>   | CAGGCCCAAGAAGAACAAG        | GTATCCTCGCAGTAGTCGCACA      |
| <i>Mcp1</i>     | TTAAAAACCTGGATCGGAACCAA    | GCATTAGCTTCAGATTTACGGGT     |
| <i>Il6</i>      | CCAGAGATACAAAGAAATGATGG    | ACTCCAGAAGACCAGAGGAAAT      |
| <i>Tnfa</i>     | GCCACCACGCTCTTCTGCCT       | GGCTGATGGTGTGGGTGAGG        |
| <i>IL-1β</i>    | AAATACCTGTGCCCTTGGGC       | CTTGGCATCCACACTCTCCAG       |
| <i>Cycs</i>     | CCAGGTATACAAGCAGGTGTGCTC   | CATCATTAGGGCCATCCTGGAC      |
| <i>Cox2</i>     | AGTTGATAACCGAGTCGTTCTGCCA  | TCGGCCTGGGATGGCATCAGT       |
| <i>Cox4</i>     | ATTGGCAAGAGAGCCATTTCTAC    | CACGCCGATCAGCGTAAGT         |
| <i>Cox6c</i>    | GGGAAGGACGTTGGTGTAGA       | CTTATAGGCAGCGGCAACTC        |
| <i>Cox8a</i>    | TTCCTGCTTCGTGTGTTGTC       | GATTGCAGAAGAGGTGACTGG       |
| <i>Nd1</i>      | CAGCCGGCCCATTCGCGTTA       | AGCGGAAGCGTGGATAGGATGC      |
| <i>Nd2</i>      | TCCTCCTGGCCATCGTACTCAACT   | AGAAGTGGAATGGGGCGAGGC       |
| <i>Nd3</i>      | ACCCTACAAGCTCTGCACGCC      | GCTCATGGTAGTGGAAGTAGAAGGGCA |
| <i>Nd4</i>      | TCGCCTACTCCTCAGTTAGCCACA   | TGATGATGTGAGGCCATGTGCCA     |
| <i>Nd5</i>      | TCGGAAGCCTCGCCCTCACA       | AGTAGGGCTCAGGCGTTGGTGT      |
| <i>Nd6</i>      | AATACCCGCAAACAAAGATCACCCAG | TGTTGGGGTTATGTTAGAGGGAGGGA  |
| <i>Atp6</i>     | GCTCACTCGCCCACTTCCTTCC     | GCCGGACTGCTAATGCCATTGGTT    |
| <i>Atp8</i>     | ATGCCACAAGTAGATACATCAACA   | GGGGTAATGAATGAGGCAAA        |
| <i>Rpl19</i>    | ATGAGTATGCTCAGGCTACAGA     | GCATTGGCGATTTTCATTGGTC      |

**Supplemental Table S2. Resources table**

| REAGENT or RESOURCE                                  | SOURCE              | IDENTIFIER        |
|------------------------------------------------------|---------------------|-------------------|
| <b>ANTIBODIES</b>                                    |                     |                   |
| GPR84 polyclonal antibody                            | Bioss               | Cat# bs-13507R-TR |
| Anti-UCP1 antibody                                   | Abcam               | Cat# ab10983      |
| Anti-Tim23 antibody (H-8)                            | Santa Cruz          | Cat# sc-514463    |
| <b>PLASMIDS</b>                                      |                     |                   |
| SRE-Luciferase                                       | Oh et al., 2010     | N/A               |
| CRE-Luciferase                                       | Oh et al., 2010     | N/A               |
| GPR84 Plasmid                                        | Origene             | Cat#: MR206206    |
| pcDNA3                                               | Oh et al., 2010     | N/A               |
| <b>CHEMICALS, PEPTIDES, AND RECOMBINANT PROTEINS</b> |                     |                   |
| One Shot® MAX Efficiency® Competent Cells            | Invitrogen          | Cat#12297-016     |
| SuperFect Transfection Reagent                       | QIAGEN              | Cat# 301305       |
| EndoFree® Plasmid Purification Maxi Kit              | QIAGEN              | Cat# 12362        |
| Oil RedO                                             | Sigma-Aldrich       | Cat# 0625-25G     |
| Collagenase B                                        | Roche               | Cat# 11088815001  |
| Normal Goat Serum                                    | Vector Laboratories | Cat# S-1000       |
| HEPES                                                | Sigma-Aldrich       | Cat# 83264        |
| HBSS                                                 | Gibco               | Cat# 14065-056    |
| BSA fraction V                                       | Sigma-Aldrich       | Cat# A7888        |
| QIAzol Lysis Reagent                                 | Qiagen              | Cat# 79306        |
| Random Primers                                       | Promega             | Cat# C1181        |
| M-MLV Reverse Transcriptase                          | Promega             | Cat# M1701        |
| RNasin® Ribonuclease Inhibitor                       | Promega             | Cat# N2511        |
| PowerUp™ SYBR™ Green Master Mix                      | Applied Biosystems  | Cat# A25742       |
| Embelin                                              | Sigma-Aldrich       | Cat# E1406-10MG   |
| Lauric acid                                          | Sigma-Aldrich       | Cat# 143-07-7     |
| Capric acid                                          | Sigma-Aldrich       | Cat# C1875-100G   |
| 6-OAU                                                | MedChemExpress      | Cat# HY-12764     |
| <b>CRITICAL COMMERCIAL ASSAYS</b>                    |                     |                   |
| <b>RNA purification kit</b>                          | <b>Qiagen</b>       | <b>Cat# 74104</b> |

|                                        |                    |                    |
|----------------------------------------|--------------------|--------------------|
| Dual luciferase reporter assay system  | Promega            | Cat# E1910         |
| Ultra Sensitive Mouse Insulin ELISA    | Crystal Chem       | Cat# 90082         |
| Pierce™ BCA Protein Assay Kit          | Thermo Scientific  | Cat# 23225         |
| Recombinant Mouse CCL2/JE/MCP-1        | R&D                | Cat# 479-JE-050/CF |
| DAB QUANTO                             | Thermo Fisher      | Cat# TA-060-QHDX   |
| Fluo-4 Calcium imaging kit             | Thermo Fisher      | Cat# F10489        |
| EXPERIMENTAL MODELS: CELL LINES        |                    |                    |
| HEK293 cell                            | ATCC               | Cat# CRL-1573      |
| Primary brown adipocytes               | This paper         | N/A                |
| EXPERIMENTAL MODELS: ORGANISMS/STRAINS |                    |                    |
| Mouse: WT C57BL6/J                     | Jackson Labs       | JAX:000664         |
| Mouse: GPR84 KO mice                   | Deltagen (Lexicon) |                    |
| OLIGONUCLEOTIDES                       |                    |                    |
| Primers, see Table S1                  | This paper         | N/A                |
| Software and Algorithms                |                    |                    |
| ImageJ                                 | NIH                | RRID: SCR_003070   |
| Prism8                                 | Graphpad           | RRID:SCR_002798    |

## Supplemental References

1. Tran KV, et al. Human thermogenic adipocyte regulation by the long noncoding RNA LINC00473. *Nat Metab.* 2020;2(5):397-412.

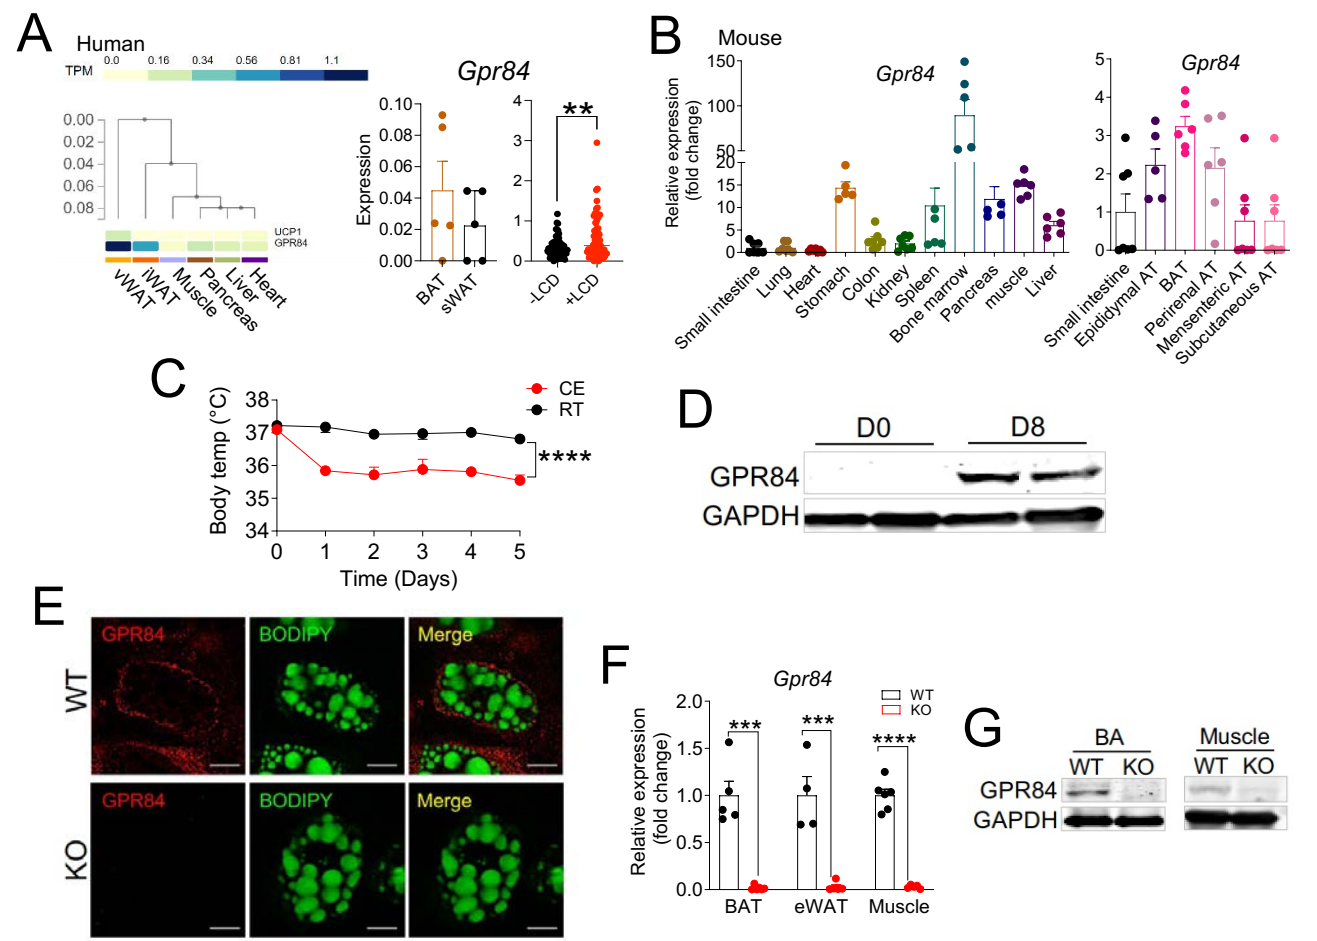

**Figure S1- Related to Figures 1 and 2. Validation of GPR84 KO mice and GPR84 expression in different tissues.**

**(A)** Expression of GPR84 correlated with the expression of UCP1. Data from the GTEx database. TPM normalized expression values of human BAT and sWAT (bar graph). Data from GSE150119 (1). TPM normalized GPR84 expression level of obese human sWAT before and after low calorie diet (- LCD vs. + LCD; scatter plot graph). Data from GSE95640. **(B)** mRNA expression pattern of GPR84 shown in different tissues or organs of mouse. n = 5 – 7/sample. **(C)** Body temperature of WT mice housed at RT and exposed to cold. n = 9/group. **(D)** Western blotting analysis of GPR84 protein expression in immature (D0) and mature (D8) brown adipocytes isolated from WT mice. Image is a representative image from three independent experiments. n = 5/group. **(E)** Representative immunofluorescence staining of GPR84 (red) and lipid droplets (BODIPY, green) in mature brown adipocytes isolated from WT and KO mice. Images are representative images from more than 10 cells of each three independent experiments. Scale bar = 10  $\mu$ m **(F)** GPR84 mRNA expression in various tissues from WT and GPR84 KO mice. n = 6/group. **(G)** Western blotting analysis of GPR84 protein expression in mature brown adipocytes (BA) isolated from BAT and muscle of WT and GPR84 KO mice. \*\*\*\*, P < 0.0001; \*\*\*, P < 0.001; \*, P < 0.05 by two-tailed Student's *t*-test **(A, F)**; two-way ANOVA followed by a Bonferroni's multiple comparison test **(C)**.

Supplemental Figure 2. Sun *et al.* ---- related to Figure 2

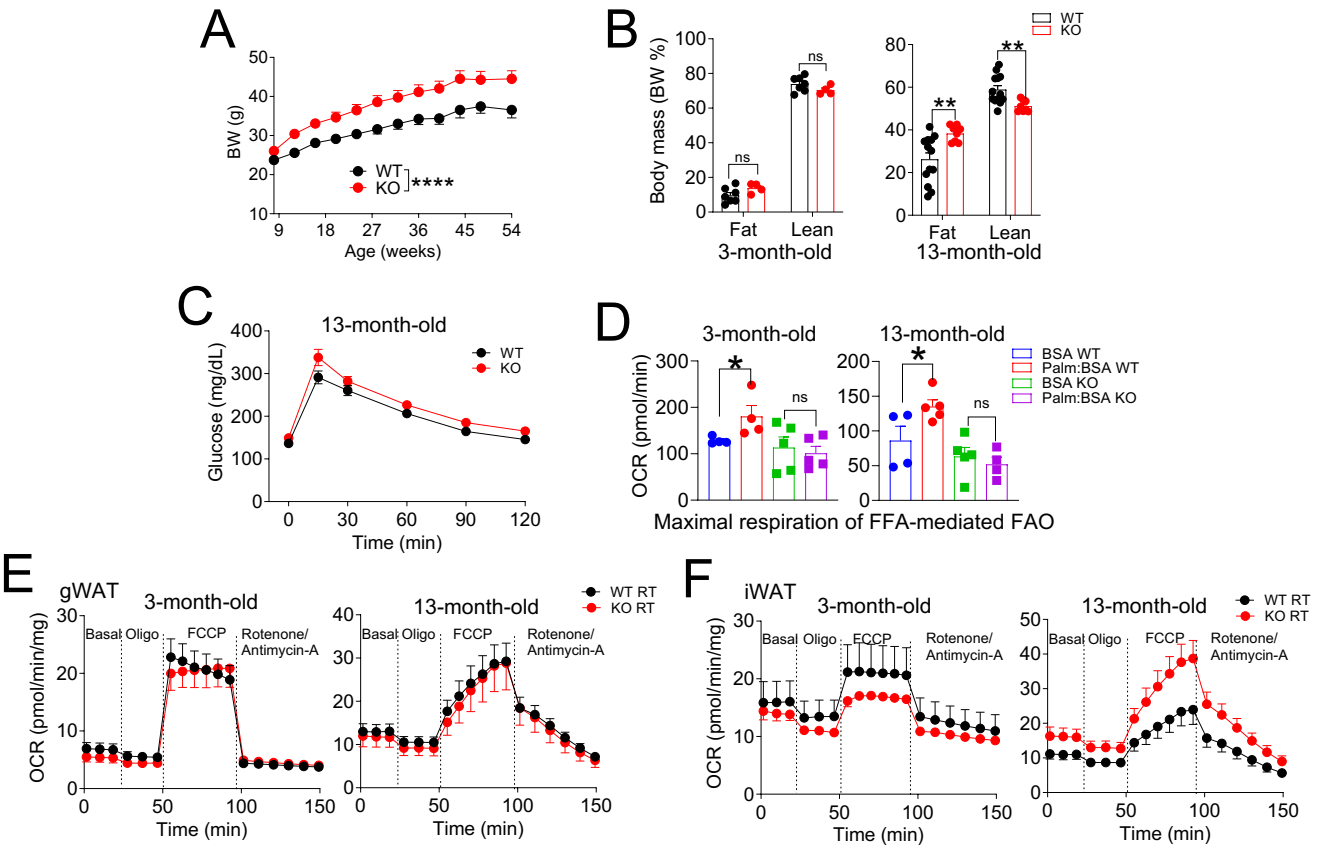

**Figure S2 –Related to Figure 2. Body weight, body mass and mitochondrial function in tissues from WT and KO mice at different ages.**

**(A)** Body weight changes of WT and KO mice.  $n = 10/\text{group}$ . **(B)** Body composition analysis including fat and lean mass for WT and GPR84 KO mice at different ages. Fat lean mass were normalized to body weight.  $n = 9 - 10$  for old mice,  $n = 5$  for young mice. **(C)** Glucose tolerance test of normal chow-fed aged WT and KO mice,  $n = 20 - 23/\text{group}$ . **(D)** Maximal OCR of fatty acid-dependent oxidation in BAT from WT and GPR84 KO mice at different ages.  $n = 5/\text{group}$ . **(E – F)** OCR of gWAT **(E)** and iWAT **(F)** from young and old WT and GPR84 KO mice. Data are represented as the mean  $\pm$  SEM in duplicate.  $n = 4/\text{group}$ . \*,  $P < 0.05$ ; \*\*,  $P < 0.01$ ; \*\*\*\*,  $P < 0.0001$  by two-tailed Student's  $t$ -test for **(B)**; one-tailed Student's  $t$ -test **(D)**; two-way ANOVA followed by a Bonferroni's multiple comparison test **(A, E, F)**. Data are represented as mean  $\pm$  SEM.

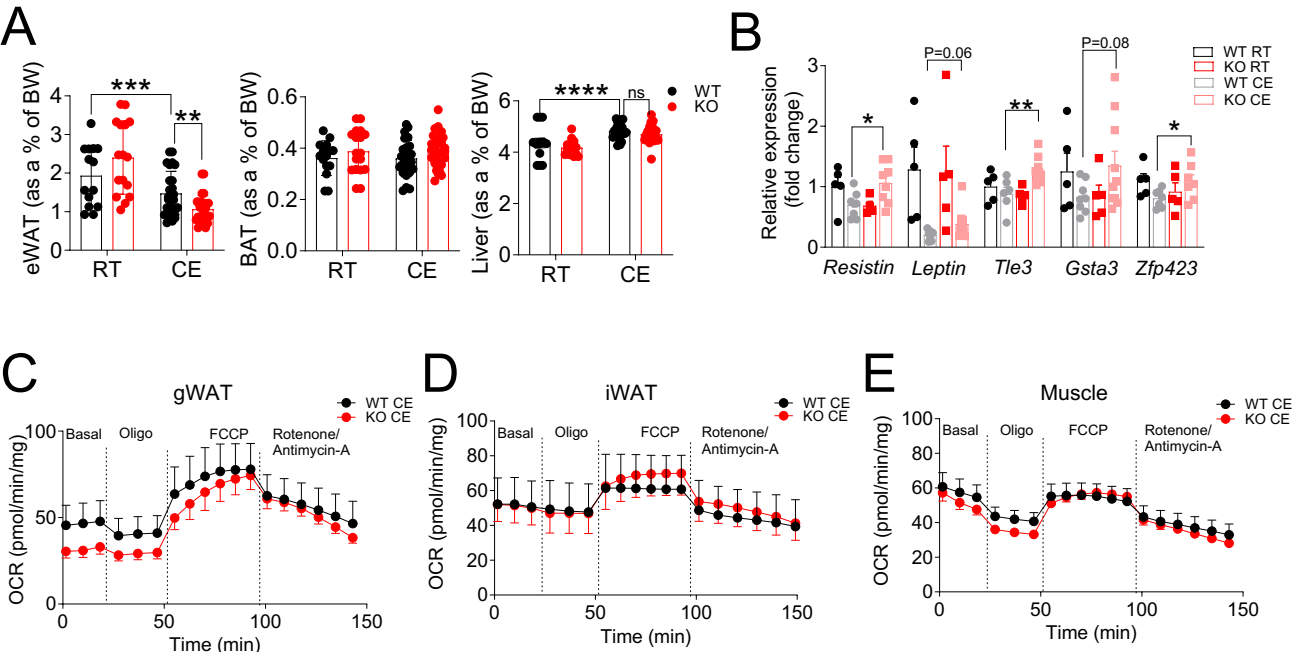

**Figure S3 – Related to Figure 3. Gene expression and OCR in tissues of young WT and GPR84 KO mice at cold exposure.** (A) Tissue weight for eWAT, BAT and liver of WT and KO mice at cold exposure. (B) White adipose tissue-selective gene expression in BAT of WT and KO mice at RT and cold for 6 days. n = 8-10/group. (C – E) OCR in gWAT (C), iWAT (D), and muscle (E) of mice at 6 days after cold exposure. Data are represented as mean ± SEM in duplicate. n = 5/group. \*, P < 0.05; \*\*, P < 0.01; \*\*\*\*, P<0.0001 by two-way ANOVA followed by a Bonferroni's multiple comparison test. Data are represented as mean ± SEM of at least three independent experiments.



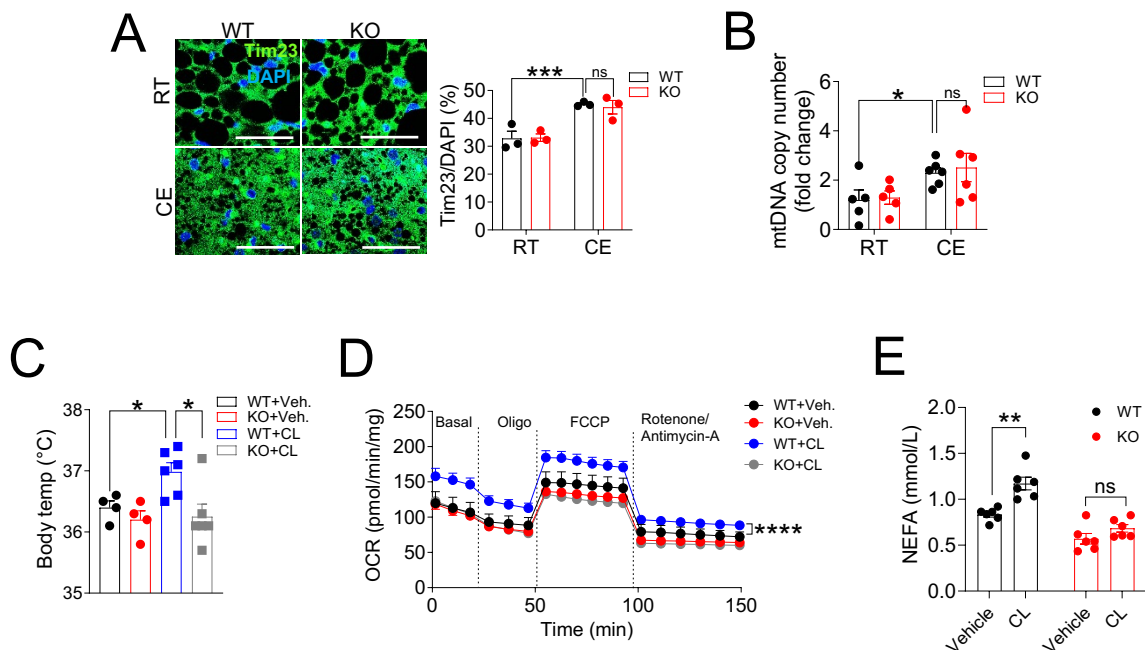

**Figure S4 – Related to Figures 3 and 4. Brown adipocytes mitochondria analysis of WT and GPR84 KO mice.**

**(A)** Representative immunofluorescence images of Tim23 from brown adipocytes of WT and KO mice at RT and CE for 6 days. The image is a representative image from three independent experiments.  $n = 3/\text{group}$ . Scale bar = 50  $\mu\text{m}$ . **(B)** The relative amount of mitochondrial DNA number was measured by qPCR from BAT of WT and KO mice at RT and CE for 6 days. Data are expressed as the mean  $\pm$  SEM from more than three independent experiments.  $n = 8\text{--}10/\text{group}$ . **(C)** Body temperature of WT and KO mice was measured after vehicle (saline) or  $\beta_3$  adrenergic receptor agonist CL316,243 administration for 15 minutes.  $n = 5\text{--}7/\text{group}$ . **(D)** OCR in BAT from WT and KO mice  $\pm$  CL316,243 administration for 15 minutes. Data are represented as the mean  $\pm$  SEM in duplicate.  $n = 3/\text{group}$ . **(E)** Cellular NEFA level was measured in mature WT and KO brown adipocytes  $\pm$  CL316,243.  $n = 5/\text{group}$ . \*,  $P < 0.05$ ; \*\*,  $P < 0.01$ ; \*\*\*\*,  $P < 0.0001$  by two-way ANOVA followed by a Bonferroni's multiple comparison test. Data are represented as mean  $\pm$  SEM of at least three independent experiments.

Supplemental Figure 5. Sun *et al.* --- related to Figure 4

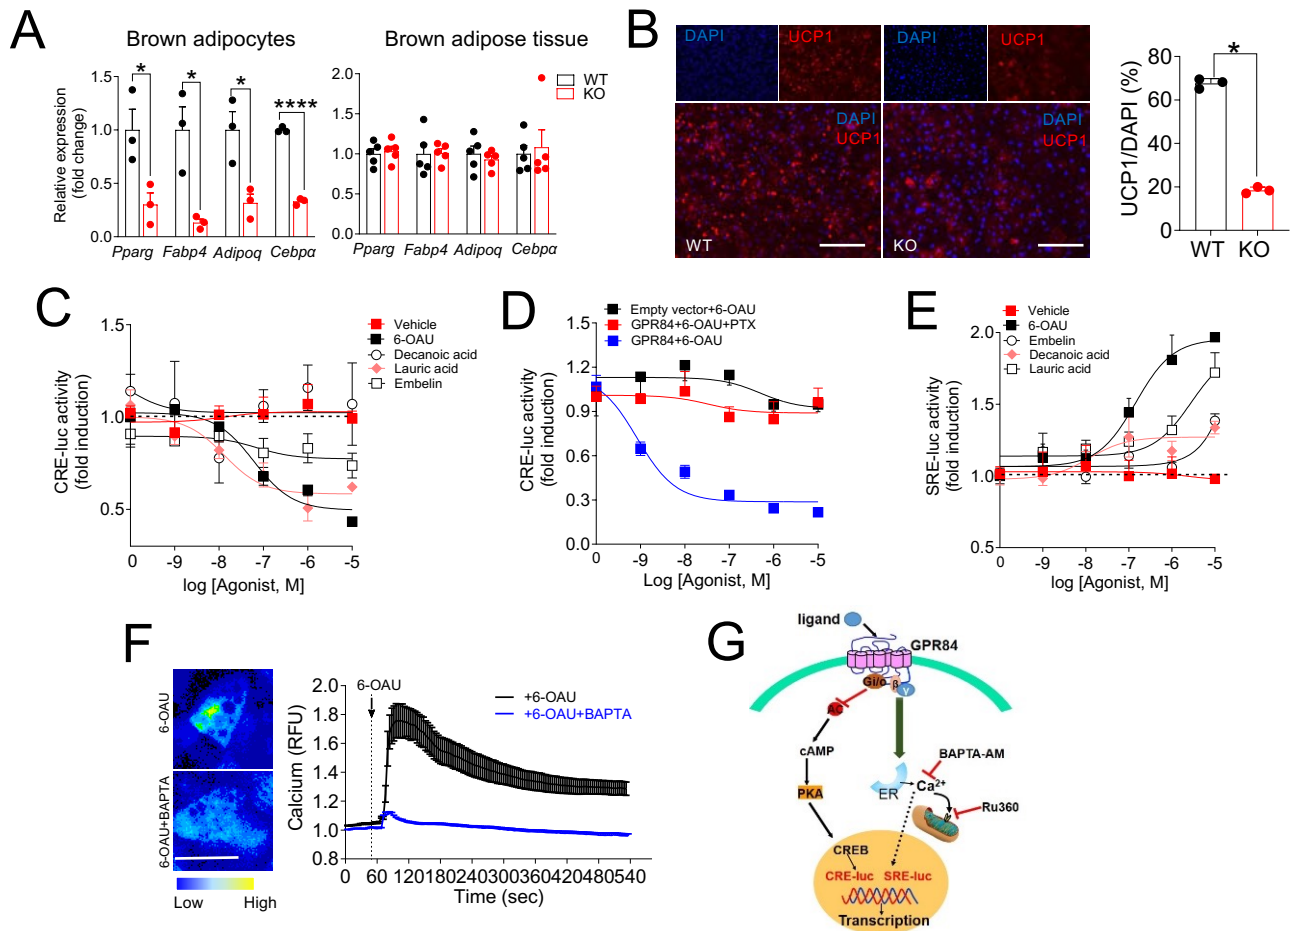

**Figure S5 –Related to Figure 4. GPR84 stimulation-mediated signal transduction in brown adipocytes.**

**(A)** Adipogenic genes were measured by qPCR in fully differentiated brown adipocytes from WT and GPR84 KO mice (left-hand side) and in BAT from WT and GPR84 KO mice (right-hand side). Data are expressed as the mean  $\pm$  SEM of at least three independent experiments in triplicate.  $n = 3/\text{group}$  for brown adipocytes;  $n = 5/\text{group}$  for BAT. **(B)** Representative images of UCP1 immunofluorescence in brown adipocytes from WT and KO mice.  $n = 3/\text{group}$ . Scale bar = 50  $\mu\text{m}$ . **(C)** CRE-luc activity in 293 cells transiently expressed GPR84. Cells were pre-treated with forskolin and then incubated with 6-OAU, Embelin, Decanoic acid (C10:0) and Lauric acid (C12:0) for 6h.  $n = 4$  each concentration. **(D)** HEK293 cells transiently expressed GPR84 were pre-treated with PTX overnight and incubated with 6-OAU for 6 h. **(E)** SRE-Luc activity in 293 cells transiently expressed GPR84 were stimulated with 6-OAU, Embelin, Decanoic acid and Lauric acid for 6 h. **(F)** Calcium mobilization in mature WT brown adipocytes treated  $\pm$  6-OAU. After incubation with Fluo-4-AM for 1h RT, WT brown adipocytes  $\pm$  BAPTA-AM (25  $\mu\text{M}$ ). Scale bar = 50  $\mu\text{m}$ . Relative fluorescence units were analyzed by ROI using Image J. **(G)** Schematic diagram for GPR84-mediated signal transduction in brown adipocytes. Left-handed side cascade pathway indicates GPR84-G-mediated pathway while right-handed side pathway indicates the GPR84-G $\beta\gamma$ -mediated calcium pathway. \*,  $P < 0.05$ ; \*\*,  $P < 0.01$  by two-tailed Student's *t*-test. Data are represented as mean  $\pm$  SEM from at least three independent experiment in triplicate.

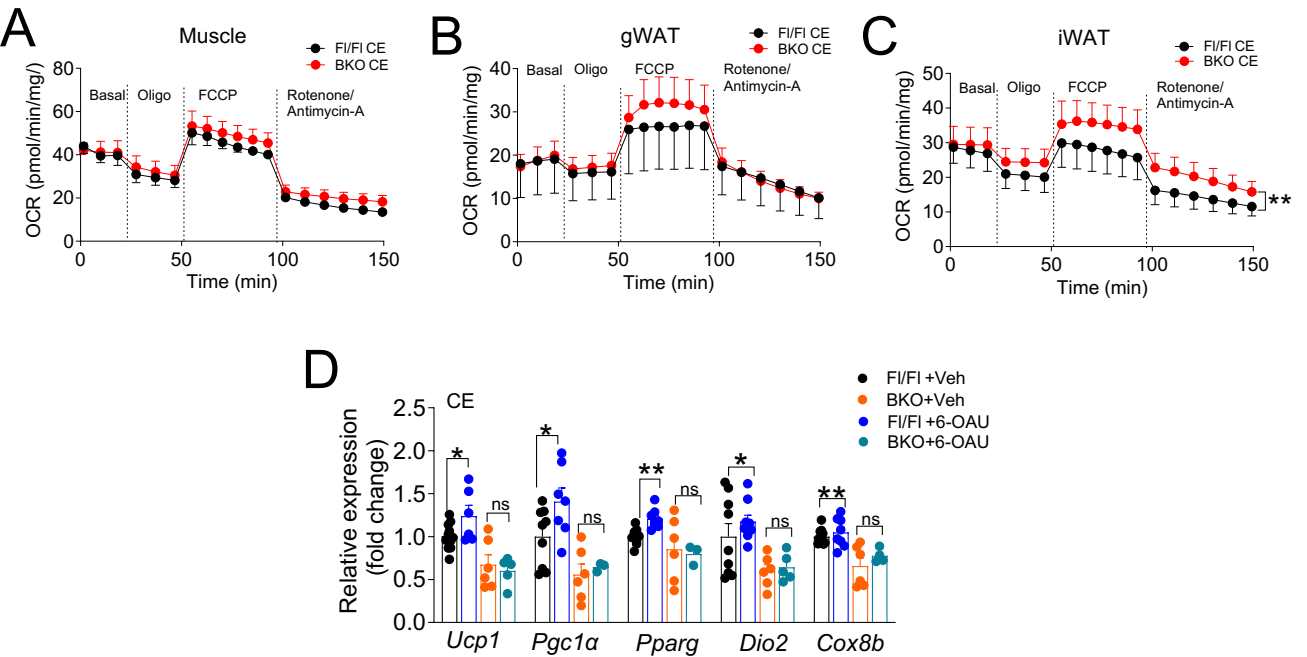

**Figure S6 –Related to Figure 6. GPR84<sup>fl/fl</sup> and GPR84<sup>BKO</sup> mice exposed to cold for 6 days.** (A–C) OCR in muscle (A) and gWAT (B) and iWAT (C) from GPR84<sup>fl/fl</sup> and GPR84<sup>BKO</sup> mice at 6 days after cold exposure. The data are represented as the mean ± SEM in duplicate. n = 4/group. (D) Thermogenic gene expression level was measured by qPCR in BAT of vehicle- and 6-OAU-treated GPR84<sup>fl/fl</sup> and GPR84<sup>BKO</sup> mice at 6 days after cold exposure. n = 3 – 8/group. \*, P < 0.05; \*\*, P < 0.01 by two-tailed Student's *t*-test (D), two-way ANOVA followed by a Bonferroni's multiple comparison test (A, B, C). Data are represented as mean ± SEM from at least three independent experiments.
